# Supplementary material
Source: PubMed Central journal article supplement (PMC1622775)
Supplement: pnas_0601945103_7.pdf [file pnas_0601945103_7.pdf]

Table 1. Selectivity of Oxidation of Mito-HE and HE.

| Oxidant                                   | Oxidant AUC | Mito-HE $\lambda_{ex}=396nm$ | HE $\lambda_{ex}=396nm$ | Mito-HE $\lambda_{ex}=510nm$ | HE $\lambda_{ex}=510nm$ |
|-------------------------------------------|-------------|------------------------------|-------------------------|------------------------------|-------------------------|
| Superoxide ( $O_2^{\cdot-}$ )             | 3.52        | 100 $\pm$ 5.5%               | 100 $\pm$ 35%           | 100 $\pm$ 5.3%               | 100 $\pm$ 21%           |
| Peroxynitrite ( $ONOO^-$ )                | 8.33        | 2.2 $\pm$ 0.3%               | 1.5 $\pm$ 0.5%          | 3.0 $\pm$ 0.9%               | 0.6 $\pm$ 0.2%          |
| Nitrosoperoxy carbonate ( $ONOOOCO_2^-$ ) | 8.33        | 2.1 $\pm$ 0.4%               | 1.6 $\pm$ 0.6%          | 1.6 $\pm$ 0.4%               | 1.2 $\pm$ 0.3%          |
| Hydrogen peroxide ( $H_2O_2$ )            | 100         | 6.4 $\pm$ 0.5%               | 6.2 $\pm$ 2.2%          | 10 $\pm$ 3.8%                | 6.7 $\pm$ 1.4%          |
| Hydroxyl Radical ( $\cdot OH$ )           | -           | 4.4 $\pm$ 0.2%               | 1.3 $\pm$ 0.5%          | 6.0 $\pm$ 1.2%               | 2.2 $\pm$ 3.2%          |
| Hypochlorous bleach ( $HOCl$ )            | 100         | 4.8 $\pm$ 0.2%               | 3.3 $\pm$ 1.2%          | 8.4 $\pm$ 0.1%               | 4.3 $\pm$ 0.9%          |

Table 1. Selectivity of oxidation of Mito-HE is expressed relative to the fluorescence generated by  $O_2^{\cdot-}$ . Oxidant exposure ( $\mu M \cdot min$ ) represents the area under the curve (AUC) or integrated amount of oxidant exposure over time to account for differences in half life decay of oxidants. A significant concentration of DMSO (28 mM) from the Mito-HE stock, as well as urate, xanthine or xanthine oxidase were all present in the hydroxyl radical generating system and will therefore have competed with the reaction of Mito-HE for hydroxyl radical. The increase in fluorescence of 10  $\mu M$  Mito-HE upon oxidant exposure was measured using  $\lambda_{ex}=396$  and  $\lambda_{ex}=510$  nm with  $\lambda_{em} = 580$  nm. Mito-HE appears to be selectively oxidized by superoxide. For example, a 28-fold greater exposure to hydrogen peroxide was required to obtain just 10% of the superoxide-induced fluorescent signal.
