# Supplementary material
Source: PubMed Central journal article supplement (PMC1622775)

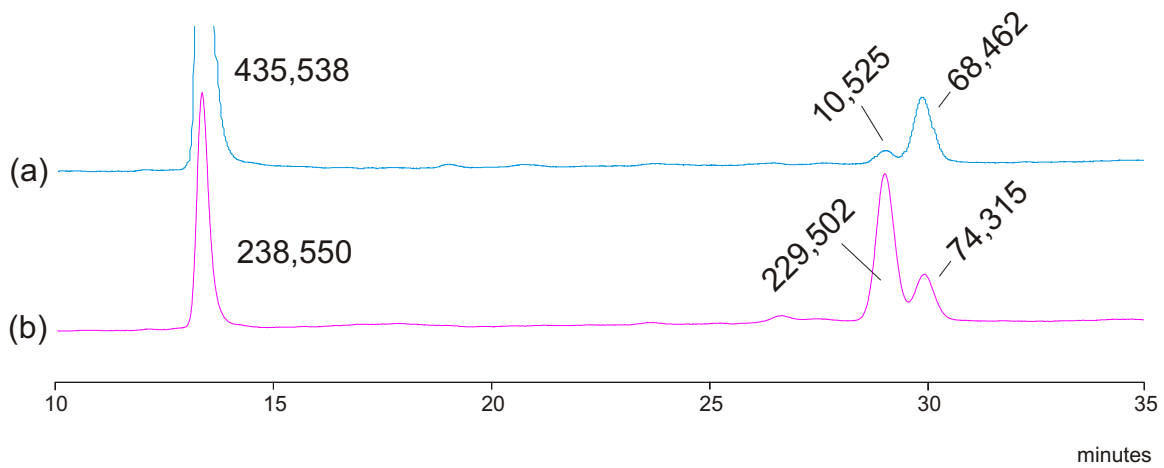

Supplement: pnas_0601945103_1.pdf [file pnas_0601945103_1.pdf]

Figure 9.

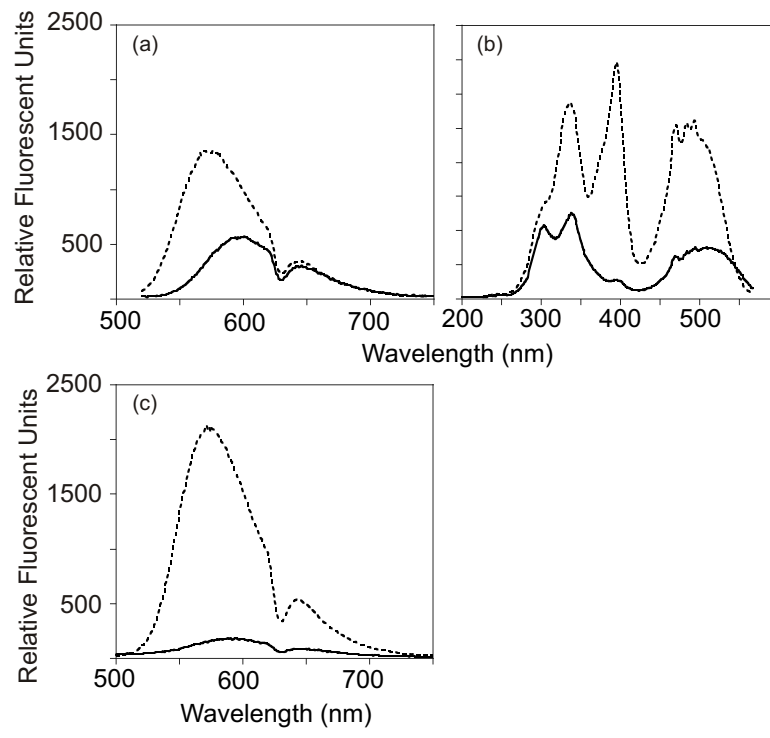

Relative Fluorescent Units

Supplement: pnas_0601945103_2.pdf [file pnas_0601945103_2.pdf]

Exc = 387 nm

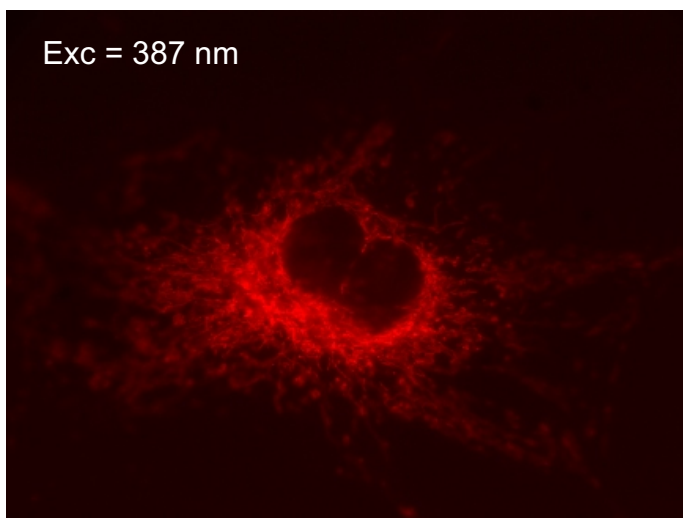

Exc = 484 nm

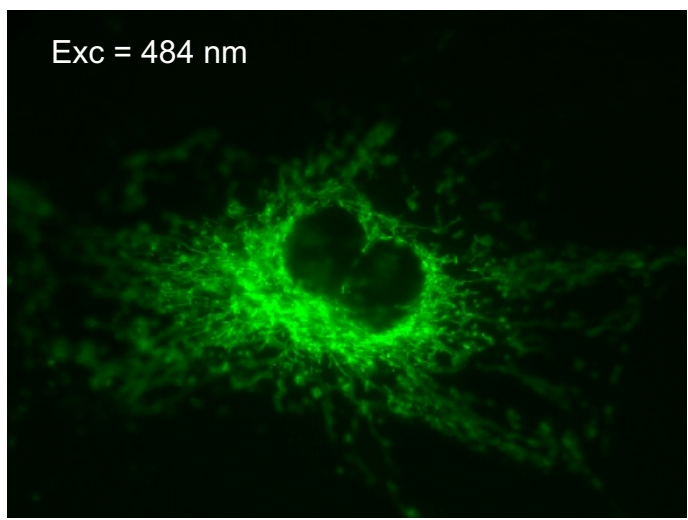

Supplement: pnas_0601945103_3.pdf [file pnas_0601945103_3.pdf]

Figure 11a.

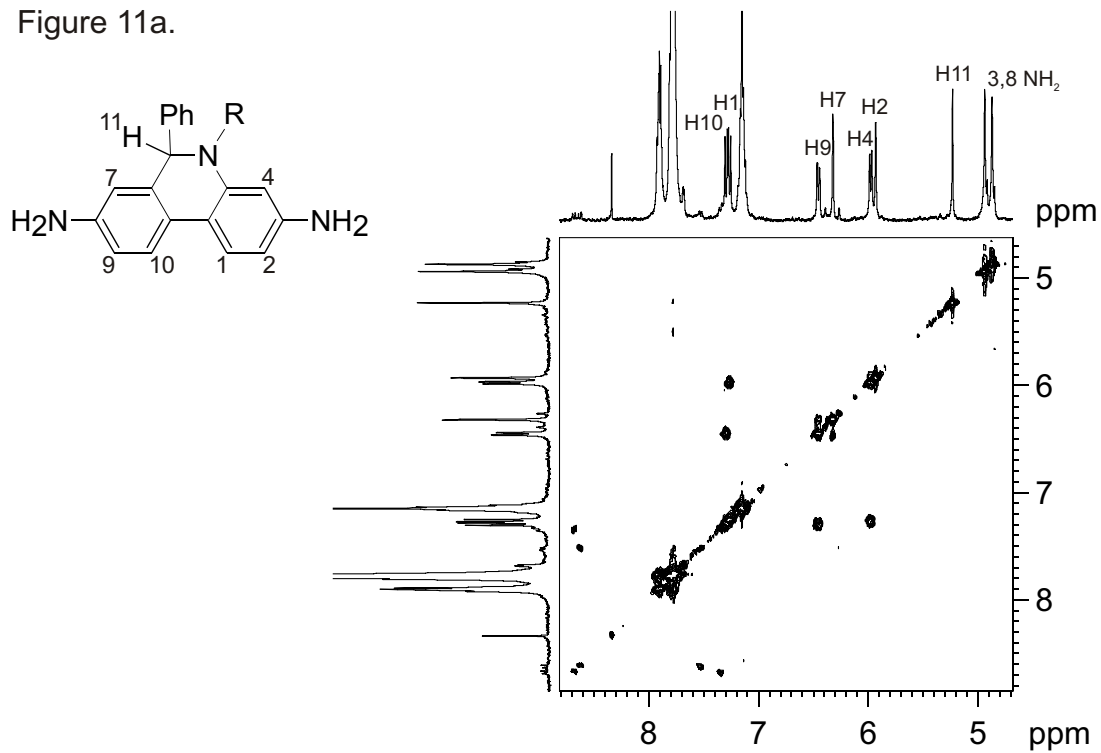

Figure 11b.

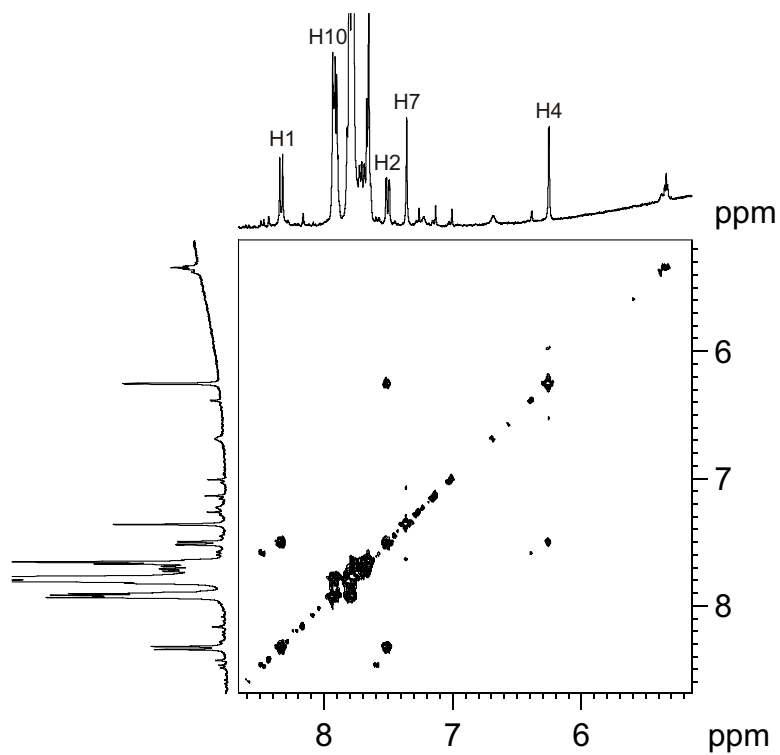

Supplement: pnas_0601945103_4.pdf [file pnas_0601945103_4.pdf]

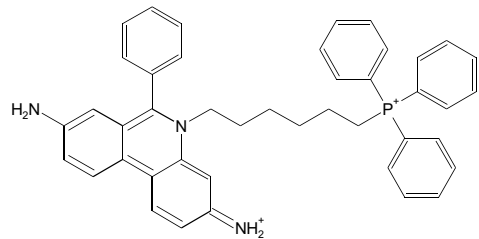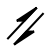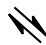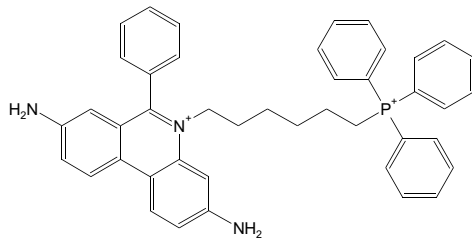

Calculated  $m/z = 315.89$

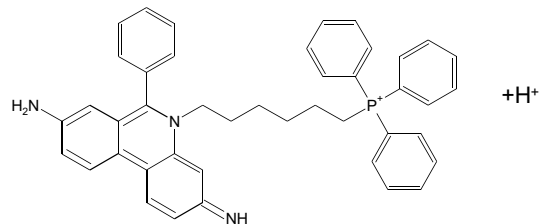

Calculated  $m/z = 630.78$  amu

Supplement: pnas_0601945103_5.pdf [file pnas_0601945103_5.pdf]

a)

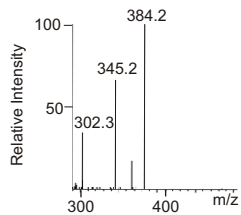

b)

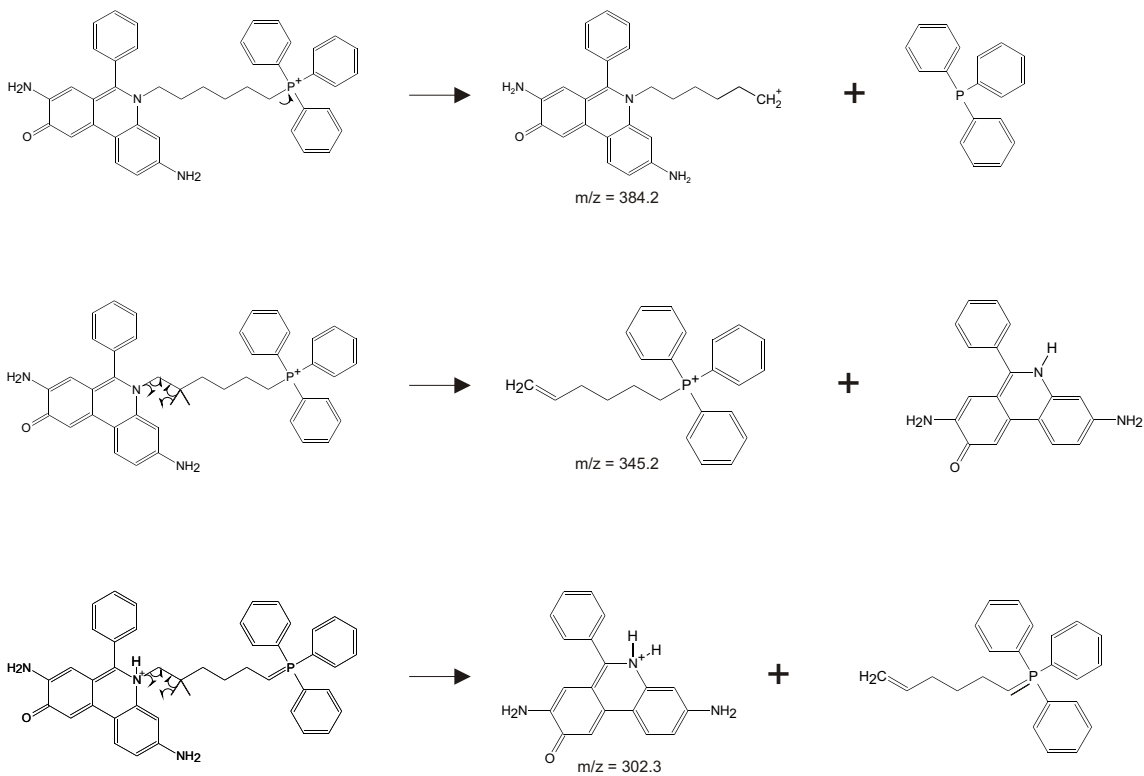

Supplement: pnas_0601945103_6.pdf [file pnas_0601945103_6.pdf]
